# Supplementary material for: Magnetoliposomes Incorporated in Peptide-Based Hydrogels: Towards Development of Magnetolipogels
Source: PubMed Central journal article supplement (PMC7558371; doi:10.3390/nano10091702), 2020-08-29
Supplement: nanomaterials-10-01702-s001.pdf [file nanomaterials-10-01702-s001.pdf]

# Magnetoliposomes Incorporated in Peptide-Based Hydrogels: Towards Development of Magnetolipogels

Sérgio R. S. Veloso<sup>1</sup>, Raquel G. D. Andrade<sup>1</sup>, Beatriz C. Ribeiro<sup>1</sup>, André V. F. Fernandes<sup>1</sup>, A. Rita O. Rodrigues<sup>1</sup>, J. A. Martins<sup>2</sup>, Paula M. T. Ferreira<sup>2</sup>, Paulo J. G. Coutinho<sup>1</sup> and Elisabete M. S. Castanheira<sup>1,\*</sup>

<sup>1</sup> Centre of Physics (CFUM), University of Minho, Campus de Gualtar, 4710-057 Braga, Portugal; sergioveloso96@gmail.com (S.R.S.V.); raquel.gau@gmail.com (R.G.D.A.); pg37976@alunos.uminho.pt (B.C.R.); pg38822@alunos.uminho.pt (A.V.F.F.); ritarodrigues@fisica.uminho.pt (A.R.O.R.); pcoutinho@fisica.uminho.pt (P.J.G.C.)

<sup>2</sup> Centre of Chemistry (CQUM), University of Minho, Campus de Gualtar, 4710-057 Braga, Portugal; jmartins@quimica.uminho.pt (J.A.M.); pmf@quimica.uminho.pt (P.M.T.F.)

\* Correspondence: ecoutinho@fisica.uminho.pt; Tel.: +351-253-604-320

## Stability of nanoparticles and magnetoliposomes dispersions

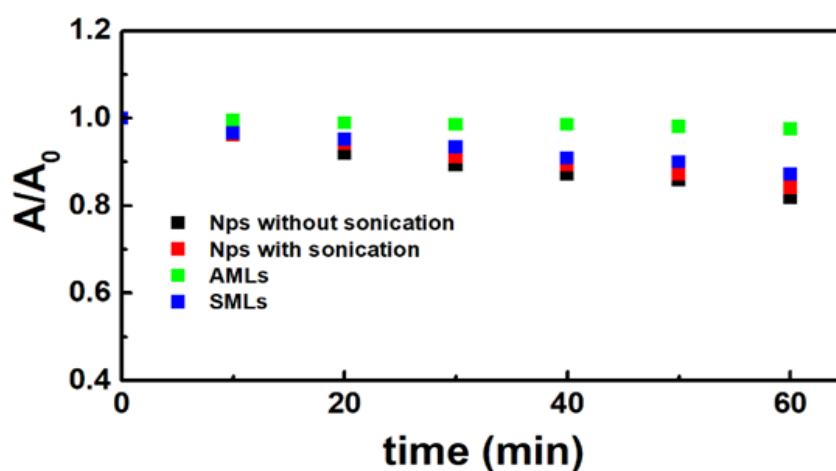

**Figure S1.** Variation of UV-Visible absorbance of nanoparticles (Nps) dispersions (with and without sonication), aqueous magnetoliposomes (AMLs) and solid magnetoliposomes (SMLs) in PBS buffer (pH = 7.0) as function of time, for 1 h.

## SEM image of solid magnetoliposomes

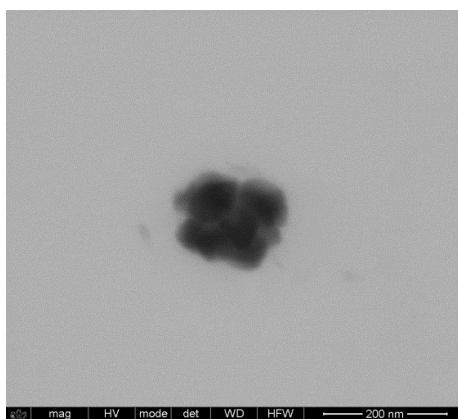

**Figure S2.** Scanning Electron Microscopy (SEM) image of solid magnetoliposomes (SMLs).

## Curcumin release assay

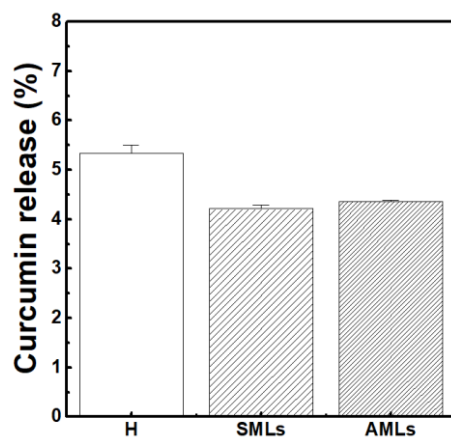

**Figure S3.** Percentage of curcumin release from the hydrogel (H) and gels containing aqueous (AMLs) and solid (SMLs) magnetoliposomes in PBS buffer (pH = 7.0) after 7 h.
